# Supplementary material
Source: PubMed Central journal article supplement (PMC3144135)
Supplement: supp_0022034510391791_JDR391791_Appendix.pdf [file supp_0022034510391791_JDR391791_Appendix.pdf]

# RESEARCH REPORTS

## Biological

P. DeVilliers<sup>1</sup>, C. Suggs<sup>2</sup>, D. Simmons<sup>2</sup>,  
V. Murrah<sup>3</sup>, and J.T. Wright<sup>2\*</sup>

<sup>1</sup>Department of Pathology, University of Alabama at Birmingham;

<sup>2</sup>Department of Pediatric Dentistry, CB #7450, and <sup>3</sup>Department of Oral Pathology, University of North Carolina at Chapel Hill, NC 27599, USA;

\*corresponding author, tim\_wright@dentistry.unc.edu

*J Dent Res* DOI: 10.1177/0022034510391791

# Microgenomics of Ameloblastoma

## APPENDIX

**Appendix Table.** Gene Ontology (GO) of Some of the Overexpressed Genes (two-fold) in Ameloblastoma, Covering Biological Process and Molecular Function

Overexpressed Genes (two-fold) in 5/5 Samples of Ameloblastoma ( $p < 0.05$ )

| Common Name                                                                                                                                              | GO Biological Process                                                                                                                           | GO Molecular Function                                                                                                                            |
|----------------------------------------------------------------------------------------------------------------------------------------------------------|-------------------------------------------------------------------------------------------------------------------------------------------------|--------------------------------------------------------------------------------------------------------------------------------------------------|
| Glucosidase, beta, acid 3 (cytosolic)<br>RAS-like, family 10, member B                                                                                   | Carbohydrate metabolism<br>Small GTPase-mediated signal transduction                                                                            | Hydrolase activity, hydrolyzing O-glycosyl compounds<br>GTP binding                                                                              |
| Melanoma antigen family E, 1<br>MyoD family inhibitor                                                                                                    | Biological process unknown<br>Cell differentiation; cytoplasmic sequestering of transcription factor; embryonic development                     | Protein binding<br>Receptor activity                                                                                                             |
| Splicing factor, arginine/serine-rich 16 (suppressor-of-white-apricot homolog, <i>Drosophila</i> )                                                       | Nuclear mRNA splicing, via spliceosome                                                                                                          |                                                                                                                                                  |
| Wingless-type MMTV integration site family, member 10A                                                                                                   | Development; frizzled-2 signaling pathway                                                                                                       | Signal transducer activity                                                                                                                       |
| Acid phosphatase 5, tartrate resistant<br>BTAF1 RNA polymerase II, B-TFIID transcription factor-associated, 170kDa (Mot1 homolog, <i>S. cerevisiae</i> ) | Negative regulation of transcription                                                                                                            | Acid phosphatase activity; hydrolase activity<br>ATP binding; helicase activity; transcription factor activity                                   |
| MYC binding protein 2<br>Purinergic receptor P2Y, G-protein coupled, 13                                                                                  | Protein ubiquitination                                                                                                                          | Ubiquitin-protein ligase activity; zinc ion binding                                                                                              |
| Sema domain, transmembrane domain (TM), and cytoplasmic domain (semaphorin) 6A                                                                           | Apoptosis; axon guidance; cell-surface receptor linked signal transduction; cytoskeleton organization and biogenesis; development; neurogenesis | Protein binding; receptor activity                                                                                                               |
| Similar to zinc finger protein<br>Zinc finger protein 265                                                                                                | RNA splicing                                                                                                                                    | Nucleic acid binding; zinc ion binding<br>RNA binding; transcription factor activity                                                             |
| Late cornified envelope 1F<br>Leucine-rich repeat-containing G-protein-coupled receptor 4                                                                | G-protein-coupled receptor protein signaling pathway                                                                                            | Protein-hormone receptor activity                                                                                                                |
| Tenascin XB<br>Symplekin                                                                                                                                 | Cell-matrix adhesion<br>Cell adhesion                                                                                                           | Protein binding<br>Protein binding                                                                                                               |
| Colipase, pancreatic<br>Casein alpha s2-like A<br>APG10L                                                                                                 | Digestion; lipid catabolism<br>Transport                                                                                                        | Enzyme activator activity<br>Transporter activity                                                                                                |
| Dual-specificity phosphatase 9                                                                                                                           | JNK cascade; inactivation of MAPK; protein amino acid dephosphorylation                                                                         | MAP kinase phosphatase activity; hydrolase activity                                                                                              |
| UDP-N-acetyl-alpha-D-galactosamine:polypeptide N-acetylgalactosaminyltransferase 10 (GalNAc-T10)                                                         |                                                                                                                                                 | Manganese ion binding; polypeptide N-acetylgalactosaminyltransferase activity; sugar binding; transferase activity, transferring glycosyl groups |
| Zinc finger, CW type with coiled-coil domain 3<br>OTU domain, ubiquitin aldehyde binding 1                                                               | Immune response; ubiquitin cycle                                                                                                                | ATP binding<br>GO:8234 (cysteine-type peptidase activity)                                                                                        |
